# Supplementary material
Source: publisher figshare collection journal article supplement (https://acs.figshare.com/ndownloader/files/13112993)
Supplement: Supplementary file 1 [file 13112993]

## Supporting Information

### **Ultra-stretchable Multilayered Fiber with a Hollow-Monolith Structure for High Performance Strain Sensor**

*Jiachen Gao,<sup>1</sup> Xiaozheng Wang,<sup>1</sup> Wei Zhai,<sup>1</sup> Hu Liu,<sup>1</sup> Guoqiang Zheng,<sup>1</sup> Kun Dai,<sup>\*1</sup>*

*Liwei Mi,<sup>2</sup> Chuntai Liu,<sup>1</sup> Changyu Shen<sup>1</sup>*

<sup>1</sup>School of Materials Science and Engineering, The Key Laboratory of Material Processing and Mold of Ministry of Education, Zhengzhou University, Zhengzhou, 450001, P. R. China

<sup>2</sup>Center for Advanced Materials Research, School of Materials and Chemical Engineering, Zhongyuan University of Technology, Zhengzhou, 450007, P. R. China

\*E-mail: kundai@zzu.edu.cn

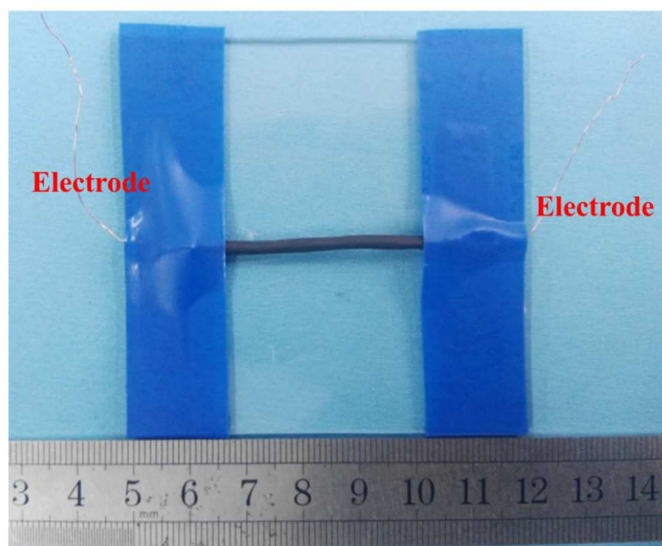

**Figure S1.** Photograph of the pressure sensor assembled by the TPU-8CNT@TPU fiber.

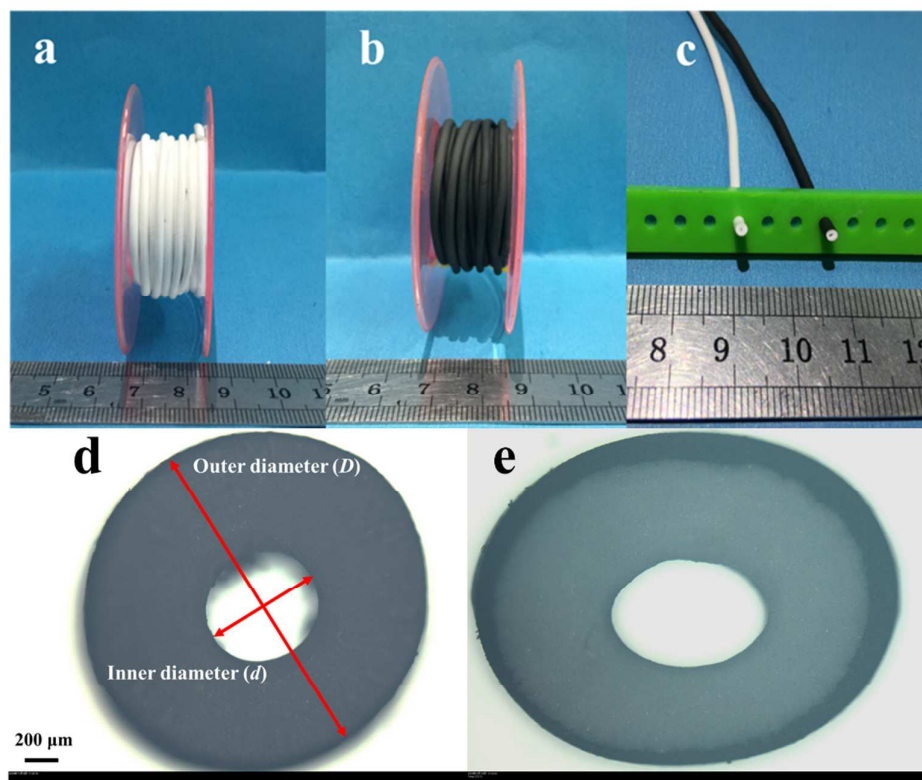

**Figure S2.** Digital photographs of (a) TPU-0CNT@TPU and (b) TPU-8CNT@TPU. (c) Comparison of cross section between TPU-0CNT@TPU (the white sample) and TPU-8CNT@TPU (the sample with a black shell). The POM images of (d) TPU-0CNT@TPU and (e) TPU-8CNT@TPU.

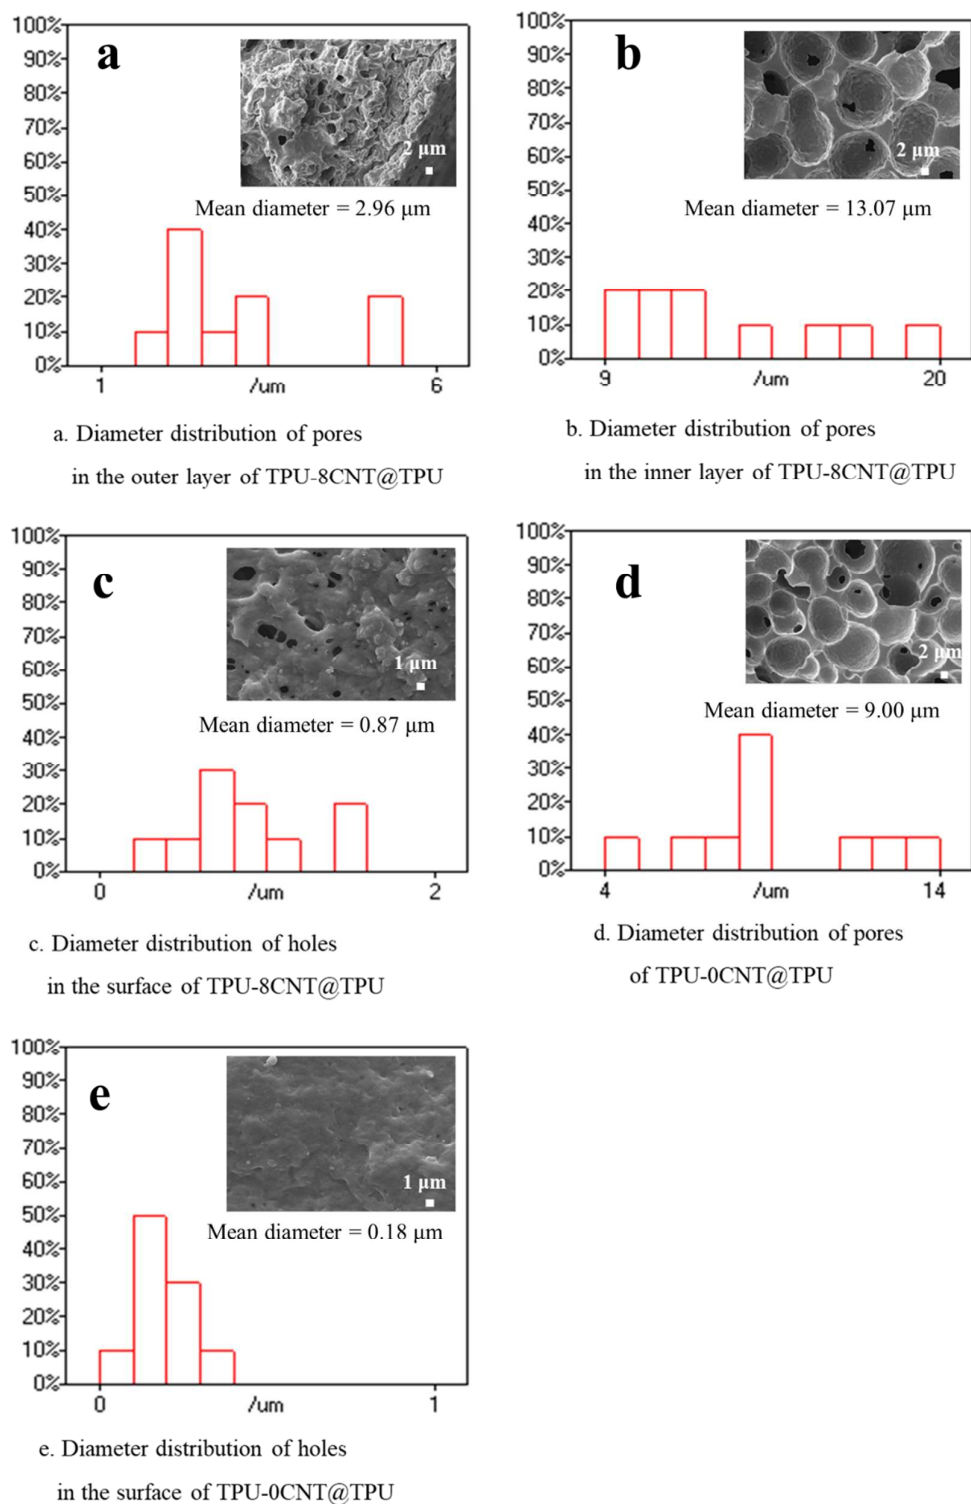

**Figure S3.** Size distribution of pores or holes in different location of the fibers (the results are averaged at least ten measured values). Diameter distribution of (a) pores

in the outer layer of TPU-8CNT@TPU; (b) pores in the inner layer of TPU-8CNT@TPU; (c) holes in the surface of TPU-8CNT@TPU; (d) pores of TPU-0CNT@TPU; (e) holes in the surface of TPU-0CNT@TPU.

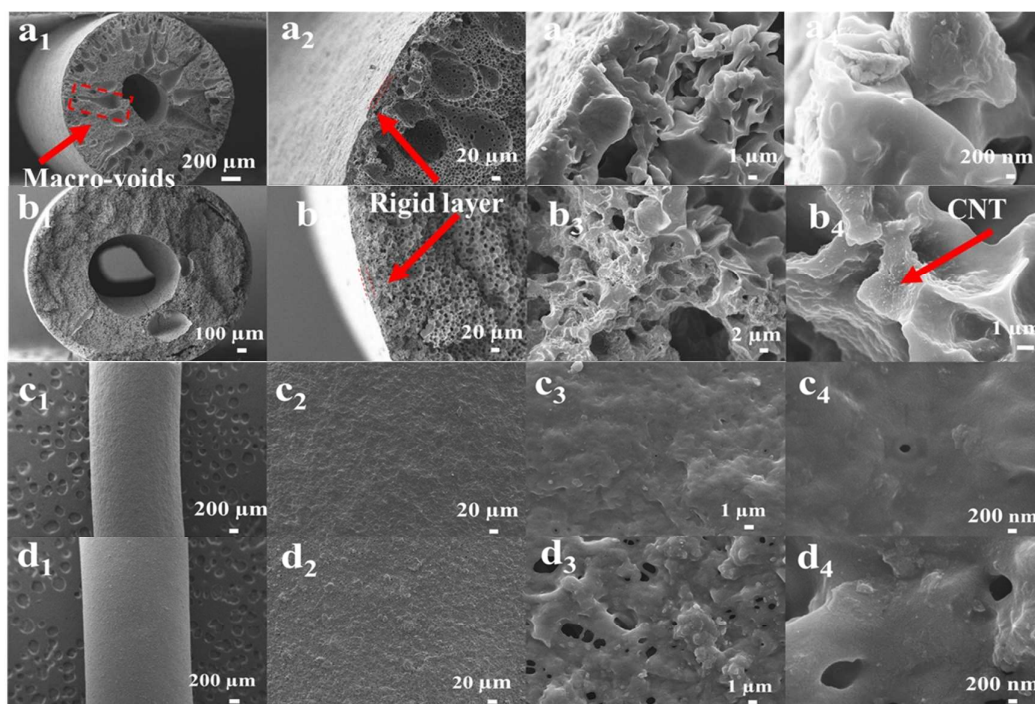

**Figure S4.** SEM images of the cross section of (a<sub>1</sub>-a<sub>4</sub>) TPU-0CNT@TPU, (b<sub>1</sub>-b<sub>4</sub>) TPU-8CNT@TPU, and surface of (c<sub>1</sub>-c<sub>4</sub>) TPU-0CNT@TPU, (d<sub>1</sub>-d<sub>4</sub>) TPU-8CNT@TPU at different magnifications.

**1. The effect of the extrusion rate ratio of the outer layer to the inner layer on the fiber structure of TPU-8CNT@TPU.**

In the experiment, the extrusion rate of the outer layer (defined as  $E_O$ ) was 0.38 mL/min, and the inner layer extrusion rate (defined as  $E_I$ ) was 1.09 mL/min, thus the extrusion rate ratio of the outer to inner (defined as  $r = E_O/E_I$ ) was 0.34: 1. The fibers with varying  $r$  were fabricated under the same conditions. Interestingly, the results showed that the hollow structures of fibers disappeared when the  $r$  was 0 ( $E_O = 0$  mL/min, Figure S5a) or infinity ( $E_I = 0$  mL/min, Figure S5b). However, the fibers showed a denser cross section when the  $r$  was 0 than that was infinity. Specially, the fibers only possessed the monolith structure, while the hollow structure disappeared when the  $r$  was increased to 100: 1 (Figure S5c); it was impossible to prepare high quality wet-spun fibers when the  $r$  reduced to 0.05: 1 (Figure S5d). The effect of the  $r$  on the fibrous structure may mainly originate from two factors: one is the solidification rate of the fibers; the other is the die swell effect of the fiber affected by the shear rate in the spinning channel.<sup>1</sup> To prepare high quality sheath-core fibers with hollow and monolith structure, the spinning rate ratio of the spinning fiber must be controlled within a certain range (0.05:1 ~ 100:1). For example, the fibers showed multilayer-hollow-monolith structure when the  $r$  was 10:1 (Figure S5e) and 1:10 (Figure S5f).

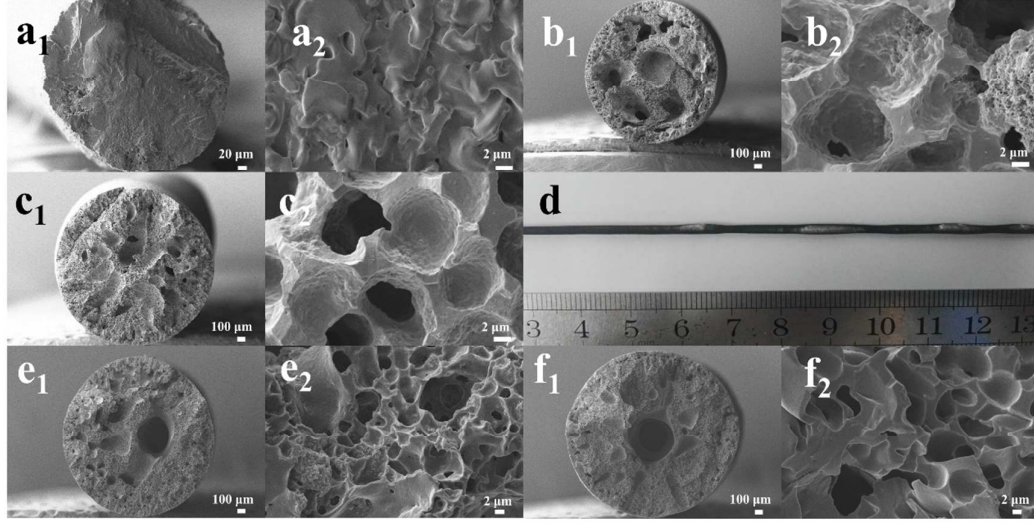

**Figure S5.** SEM images of cross section of TPU-8CNT@TPU with different  $r$ . (a<sub>1</sub>-a<sub>2</sub>)  $r = 0$ , (b<sub>1</sub>-b<sub>2</sub>)  $r = \infty$ , (c<sub>1</sub>-c<sub>2</sub>)  $r = 100:1$ , (e<sub>1</sub>-e<sub>2</sub>)  $r = 10:1$ , (f<sub>1</sub>-f<sub>2</sub>)  $r = 1:10$  at different magnifications. (d) Digital photograph of the fiber with the  $r$  of 0.05:1.

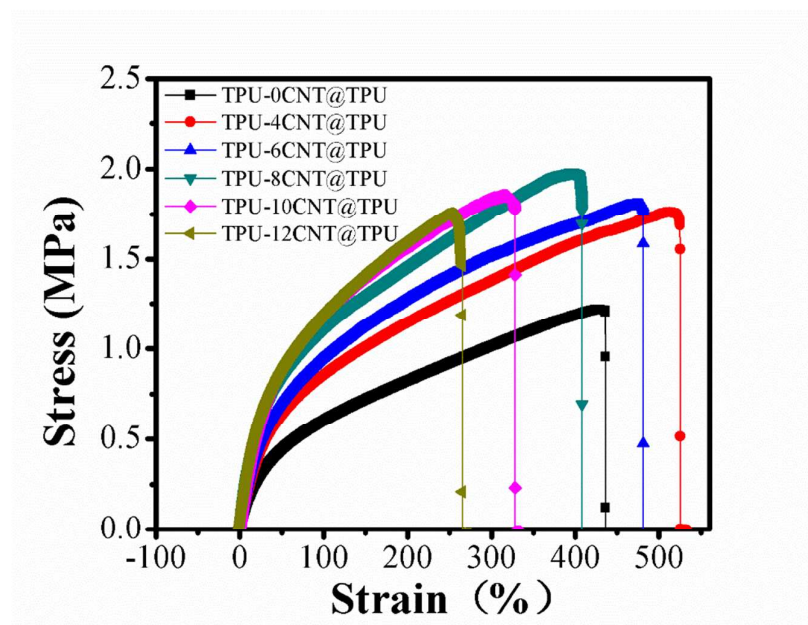

**Figure S6.** Typical stress vs. strain curves of the fibers with different CNTs loadings.



**Table S1.** Performance parameters of the fibers with different CNTs loadings.

|                      | Breaking<br>elongation | Strength<br>(MPa) | Modulus<br>(MPa) | Density<br>(g/cm <sup>3</sup> ) |
|----------------------|------------------------|-------------------|------------------|---------------------------------|
| <b>TPU-0CNT@TPU</b>  | 4.32 ± 0.12            | 1.22 ± 0.057      | 1.44 ± 0.13      | 0.342 ± 0.0052                  |
| <b>TPU-4CNT@TPU</b>  | 4.76 ± 0.32            | 1.67 ± 0.099      | 1.86 ± 0.11      | 0.412 ± 0.0097                  |
| <b>TPU-6CNT@TPU</b>  | 4.44 ± 0.44            | 1.83 ± 0.077      | 2.34 ± 0.22      | 0.456 ± 0.024                   |
| <b>TPU-8CNT@TPU</b>  | 3.81 ± 0.31            | 1.86 ± 0.077      | 2.92 ± 0.45      | 0.464 ± 0.013                   |
| <b>TPU-10CNT@TPU</b> | 3.19 ± 0.29            | 1.84 ± 0.093      | 3.04 ± 0.25      | 0.478 ± 0.019                   |
| <b>TPU-12CNT@TPU</b> | 2.83 ± 0.26            | 1.79 ± 0.21       | 3.19 ± 0.34      | 0.513 ± 0.013                   |

**Note:** the results are averaged at least five different fiber samples. The density is calculated using equation:  $\rho = m/V$ , where  $\rho$ ,  $m$  and  $V$  are the density, mass, volume, respectively. The mass of the fibers was weighed by using a precision electronic balance (ESJ 182-4, Shenyang Shenyu Longteng Balance Co. Ltd., China).

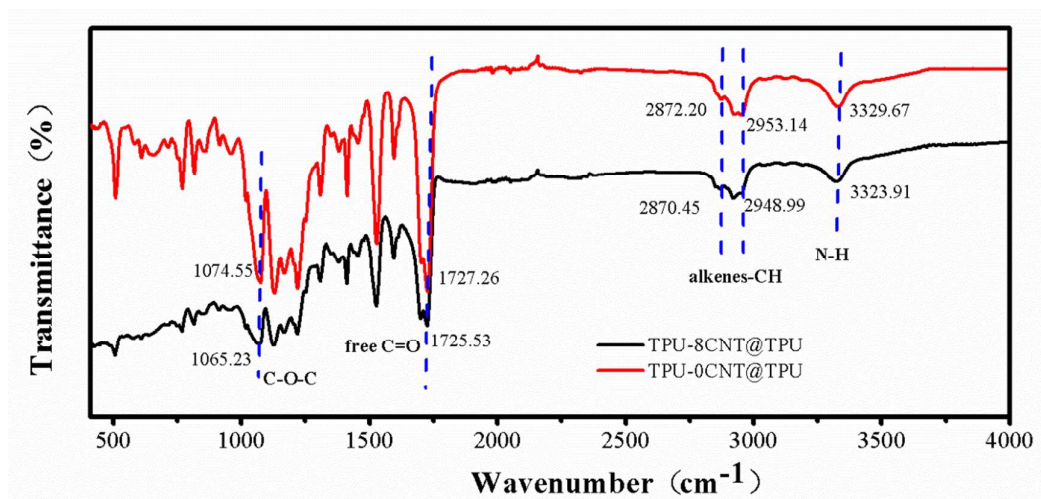

**Figure S7.** FTIR spectra of TPU-8CNT@TPU and TPU-0CNT@TPU (the spectrometer, Nicolet iS50). After the introduction of CNTs, several characteristic peaks of the fiber tend to be weaker and shift toward the low wavenumber, showing strong interactions between TPU polymer chains and CNTs.

Please see the references 2-4 on the discussions about the wavenumber of the corresponding functional groups.

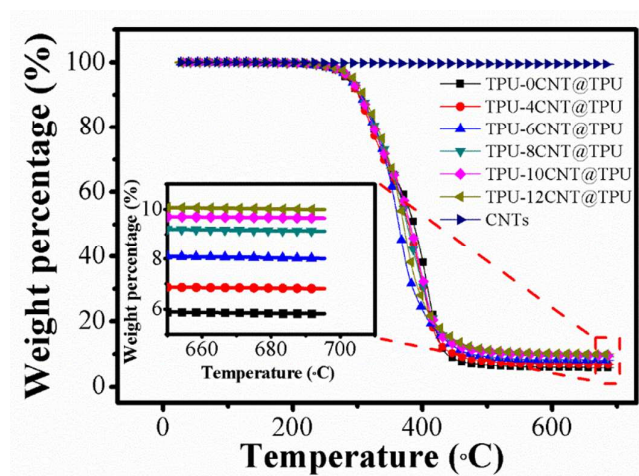

**Figure S8.** Thermogravimetric analysis (TGA) curves of CNTs and the fibers with different CNTs loadings. TGA was performed under a nitrogen atmosphere on a TGA/TA Q50 (TA Instruments Co., USA) from 30 to 700 °C with a heating rate of 10 °C/min.

**Table S2.** TGA results of CNTs and the fibers with different CNTs loadings.

| Samples       | Residue (wt. %) | $\omega_{\text{CNTs}}$ (wt. %) |
|---------------|-----------------|--------------------------------|
| TPU-0CNT@TPU  | 5.82            | 0                              |
| TPU-4CNT@TPU  | 6.81            | 0.99                           |
| TPU-6CNT@TPU  | 8.01            | 2.19                           |
| TPU-8CNT@TPU  | 9.13            | 3.31                           |
| TPU-10CNT@TPU | 9.64            | 3.82                           |
| TPU-12CNT@TPU | 9.99            | 4.17                           |
| CNTs          | 99.45           |                                |

**Note :** the mass fraction of CNTs in the whole fiber is calculated using equation:

$\omega_{\text{CNTs}} = R_c - R_p$ , where  $R_c$ ,  $R_p$  and  $\omega_{\text{CNTs}}$  represent the residual weight percentage of

TPU-xCNT@TPU, TPU-0CNT@TPU at 700 °C and the CNTs in the fibers.<sup>2</sup>

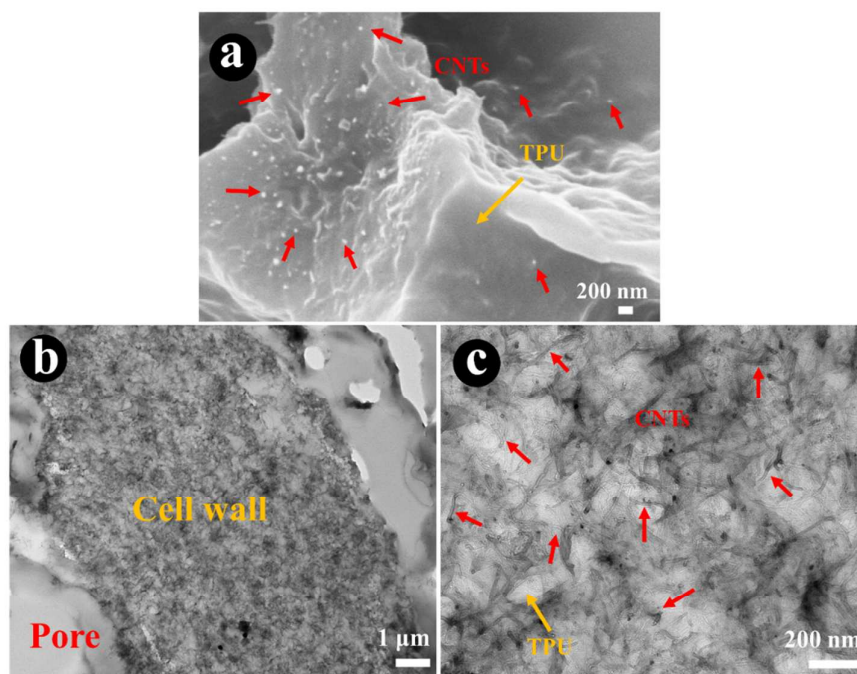

**Figure S9.** SEM (a) and TEM images (b), (c) of sensitive zone of TPU-8CNT@TPU.

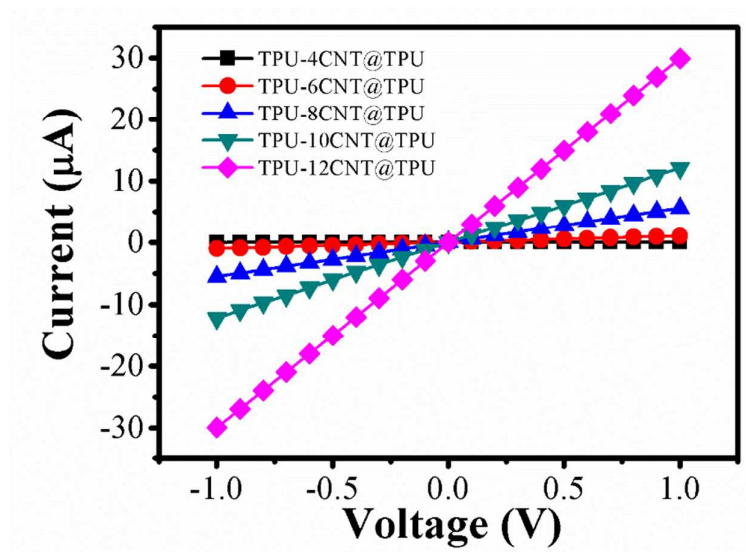

**Figure S10.** *I-V* characteristic curves of the fibers with different CNTs loadings (the electrochemical work station, RST5200F, Suzhou Risetest Electronic Co., Ltd., China).

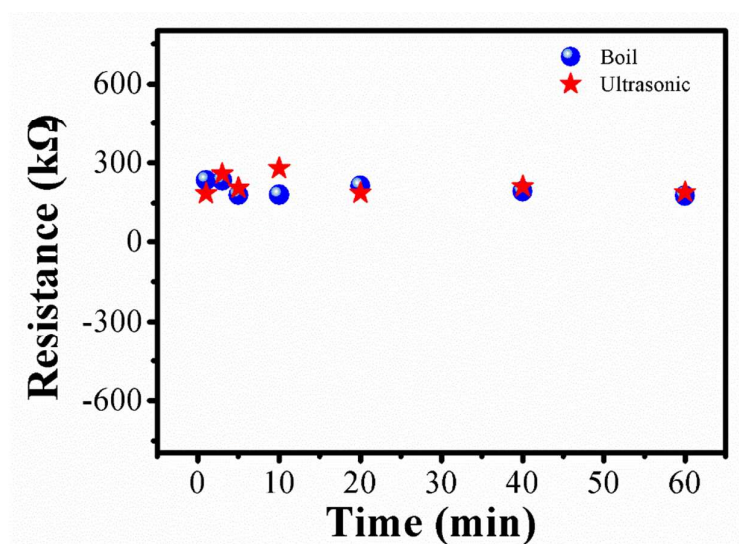

**Figure S11.** Change in  $R$  of the TPU-8CNT@TPU fiber as a function of ultrasonic and boiling time in deionized water to show the durability.

**Table S3.** The summary of maximum detection range and GF for typical flexible strain sensors reported in recent years.

| <b>Materials</b>                           | <b>Maximum<br/>detection range</b> | <b>GF</b> | <b>References</b> |
|--------------------------------------------|------------------------------------|-----------|-------------------|
| SWCNT/PU                                   | 60%                                | 6.5       | 5                 |
| Hybrid<br>SWCNTs/PEDOT:PSS/PU              | 100%                               | 62        | 6                 |
| PEDOT:PSS/PVA                              | 1.2%                               | 396       | 7                 |
| MWCNTs/PU                                  | 400%                               | 69        | 8                 |
| Graphene/PE                                | 100%                               | $\leq 10$ | 9                 |
| Graphene/Nanocellulose<br>fibril/PDMS      | 100%                               | 7.1       | 10                |
| Graphene sheets/ PDMS                      | 7.5%                               | 402.5     | 11                |
| Carbonized silk<br>fabric/Ecoflex          | 500%                               | 37.5      | 12                |
| CNTs/Lamellar layered<br>double hydroxides | 410%                               | 12        | 13                |
| SWCNTs/Cotton//PU                          | 300%                               | 0.65      | 14                |
| Graphene/PVA                               | 150%                               | 1.33      | 15                |
| MWCNT forest/PU                            | 300%                               | 1.07      | 16                |
| MWCNT/TPU                                  | 350%                               | 166.7     | This work         |



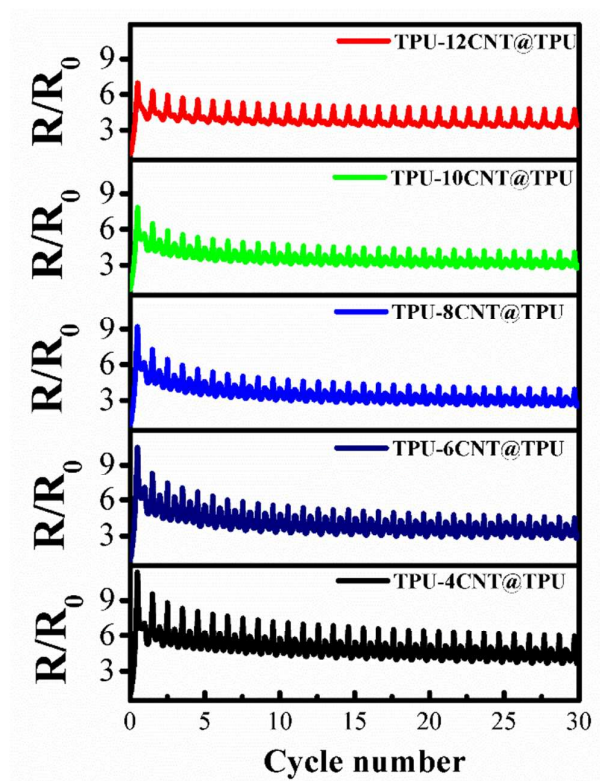

**Figure S12.** Change in  $R/R_0$  of the fibers with different CNTs loadings under 80% strain at a rate of 50 mm/min during 1-30 cycles.

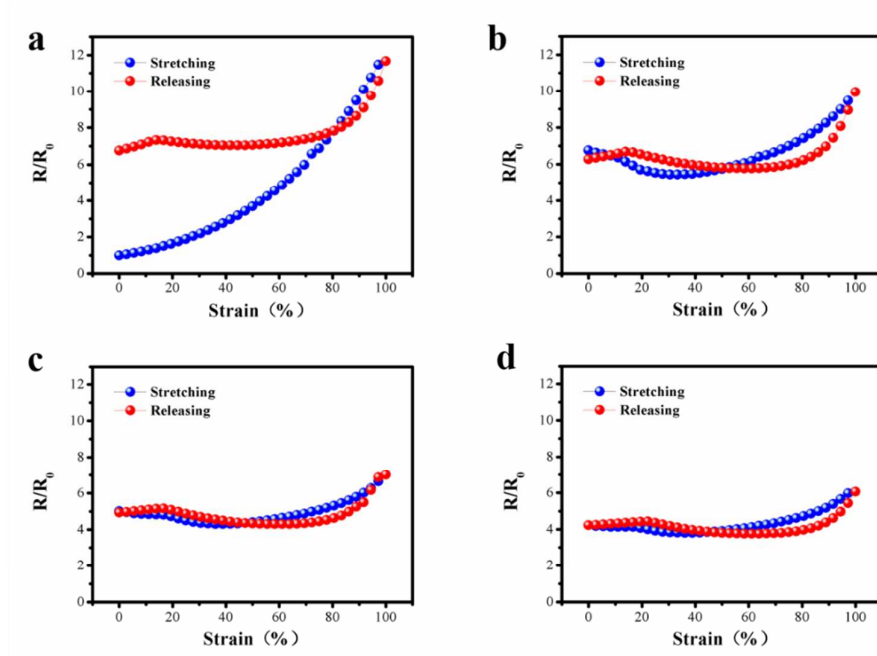

**Figure S13.**  $R/R_0$ -strain curves of TPU-8CNT@TPU for cyclic stretching-relaeasing tests: (a) 1st cycle, (b) 2nd cycle, (c) 10th cycle, (d) 30th cycle.

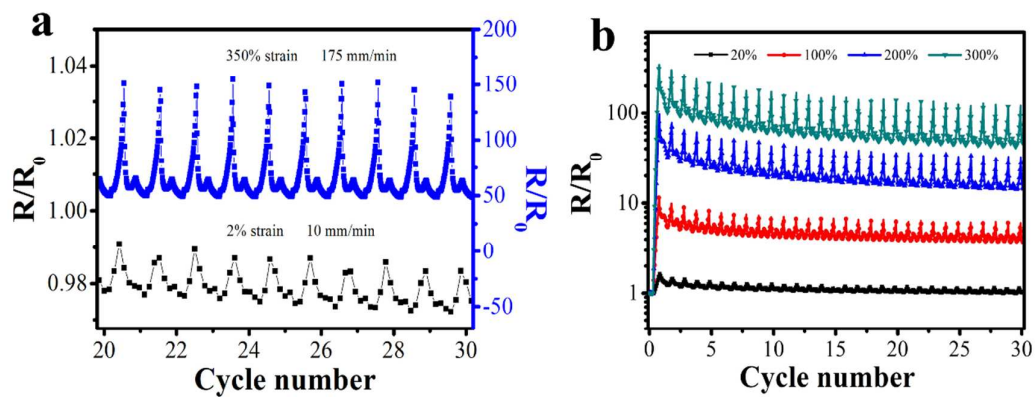

**Figure S14.** (a) Change in  $R/R_0$  of TPU-8CNT@TPU under 2% and 350% strain during 21-30 cycles. (b) Change in  $R/R_0$  of TPU-8CNT@TPU with the same frequency of 0.014 Hz at different strains during 1-30 cycles.

## 2. Determination of response time.

To calculate the strain response time, a step strain of 5% was applied at a rate of 500 mm/min for TPU-8CNT@TPU. The current response time of TPU-8CNT@TPU in the tensile process of 5% strain is defined as  $t_1$  (Figure S12a), which is recorded by an electrochemical work station (RST5200F, Suzhou Risetest Electronic Co., Ltd., China), and tensile time of the tensile testing machine is defined as  $t_2$ , and the strain response time  $\Delta t_T$  is calculated as follows:

$$t_1 = 19.8508258 - 19.5037633 = 0.3470625 \text{ s}$$

$$t_2 = 30 \text{ mm} \times 5\% / (500 \text{ mm/min}) = 0.18 \text{ s}$$

$$\Delta t_T = t_1 - t_2 = 0.1670625 \text{ s} \approx 167 \text{ ms}$$

The compressive response time  $\Delta t_C$  is calculated by the same method, and a compression displacement of 1 mm is applied at the rate of 500 mm/min for TPU-8CNT@TPU (Figure S12b), the compressive response time  $\Delta t_C$  is calculated as follows:

$$t_1 = 17.2444816 - 17.0090301 = 0.2354515 \text{ s}$$

$$t_2 = (1 \text{ mm} / 500 \text{ mm/min}) = 0.12 \text{ s}$$

$$\Delta t_C = t_1 - t_2 = 0.1154515 \text{ s} \approx 115 \text{ ms}$$

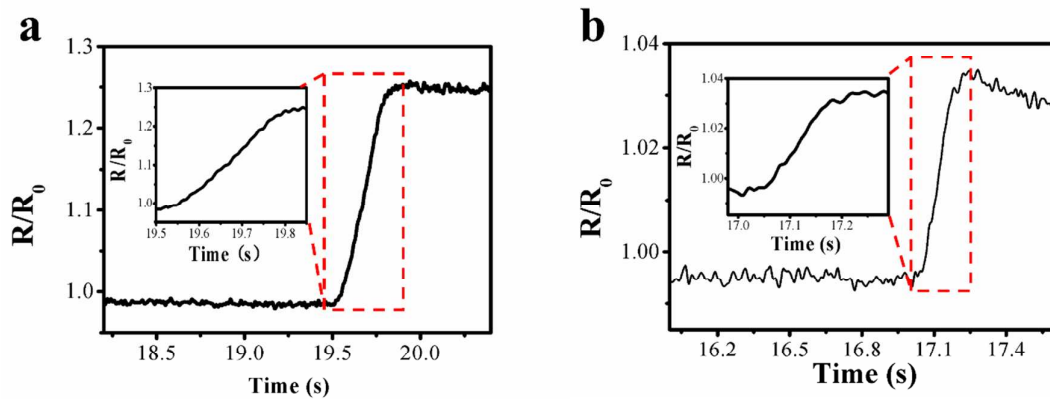

**Figure S15.** Response time of TPU-8CNT@TPU under (a) a step strain of 5% in tension and (b) 1 mm displacement at a strain rate of 500 mm/min in compression.

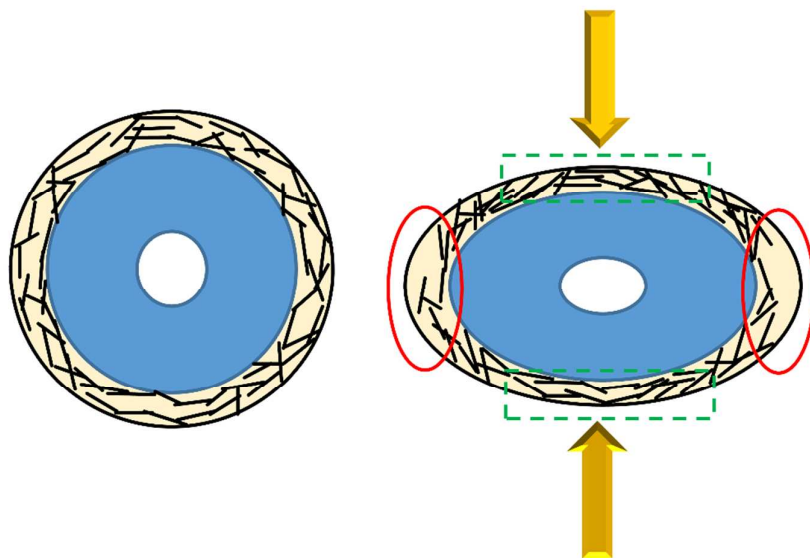

**Figure S16.** Schematic illustration of compression response mechanism.

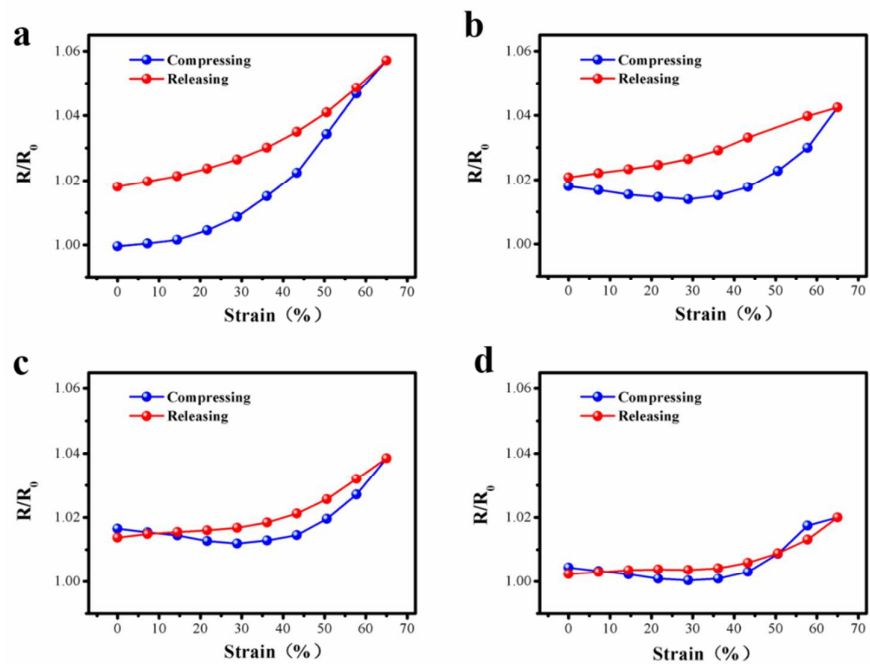

**Figure S17.**  $R/R_0$ -strain curves of TPU-8CNT@TPU for cyclic compressing-releasing tests: (a) 1st cycle, (b) 2nd cycle, (c) 4th cycle, (d) 10th cycle.

**Table S4.** Parameters obtained by fitting  $R/R_0$  vs. strain curves with Equation (6) of TPU-8CNT@TPU in tension and compression, respectively.

|             | C       | M        | E         | W        | U        | V        |
|-------------|---------|----------|-----------|----------|----------|----------|
| Tension     | 0.01201 | 0.60455  | 127.75779 | 0.33129  | -0.23464 | 0.0322   |
| Compression | 0.00446 | -0.21202 | 46.57262  | -0.07359 | 0.36182  | -0.16917 |

## REFERENCES

- (1) Ishigami, T.; Kasuya, Y.; Rajabzadeh, S.; Ohmukai, Y.; Kakihana, Y.; Matsuyama, H., Effect of Solidification Rate of Polymer Solution on the Die-Swell during Hollow Fiber Spinning by Non-Solvent Induced Phase Separation. *J. Membr. Sci.* **2014**, *472*, 194-201.
- (2) Guan, X.; Zheng, G.; Dai, K.; Liu, C.; Yan, X.; Shen, C.; Guo, Z., Carbon Nanotubes-Adsorbed Electrospun PA66 Nanofiber Bundles with Improved Conductivity and Robust Flexibility. *ACS Appl. Mater. Interfaces* **2016**, *8*, 14150-14159.
- (3) Li, Y.; Zhou, B.; Zheng, G.; Liu, X.; Li, T.; Yan, C.; Cheng, C.; Dai, K.; Liu, C.; Shen, C.; Guo, Z., Continuously Prepared Highly Conductive and Stretchable SWNT/MWNT Synergistically Compositated Electrospun Thermoplastic Polyurethane Yarns for Wearable Sensing. *J. Mater. Chem. C* **2018**, *6*, 2258-2269.
- (4) Wang, Y.; Hao, J.; Huang, Z.; Zheng, G.; Dai, K.; Liu, C.; Shen, C., Flexible Electrically Resistive-Type Strain Sensors Based on Reduced Graphene



Oxide-Decorated Electrospun Polymer Fibrous Mats for Human Motion Monitoring.

*Carbon* **2018**, *126*, 360-371.

(5) Seyedin, S.; Razal, J. M.; Innis, P. C.; Wallace, G. G., A Facile Approach to Spinning Multifunctional Conductive Elastomer Fibres with Nanocarbon Fillers.

*Smart Mater. Struct.* **2016**, *25*, 035015.

(6) Roh, E.; Hwang, B. U.; Kim, D.; Kim, B. Y.; Lee, N. E., Stretchable, Transparent, Ultrasensitive, and Patchable Strain Sensor for Human-Machine Interfaces

Comprising A Nanohybrid of Carbon Nanotubes and Conductive Elastomers. *ACS*

*Nano* **2015**, *9*, 6252-6261.

(7) Liu, N.; Fang, G.; Wan, J.; Zhou, H.; Long, H.; Zhao, X., Electrospun PEDOT:PSS-PVA Nanofiber Based Ultrahigh-Strain Sensors with Controllable

Electrical Conductivity. *J. Mater. Chem.* **2011**, *21*, 18962-18966.

(8) Slobodian, P.; Riha, P.; Benlikaya, R.; Svoboda, P.; Petras, D., A Flexible Multifunctional Sensor Based on Carbon Nanotube/Polyurethane Composite. *IEEE*

*Sens. J.* **2013**, *13*, 4045-4048.

(9) Cheng, Y.; Wang, R.; Sun, J.; Gao, L., A Stretchable and Highly Sensitive Graphene-Based Fiber for Sensing Tensile Strain, Bending, and Torsion. *Adv. Mater.*

**2015**, *27*, 7365-7371.

(10) Yan, C.; Wang, J.; Kang, W.; Cui, M.; Wang, X.; Foo, C. Y.; Chee, K. J.; Lee, P. S., Highly Stretchable Piezoresistive Graphene-Nanocellulose Nanopaper for Strain

Sensors. *Adv. Mater.* **2014**, *26*, 2022-2027.

(11) Wang, D. Y.; Tao, L. Q.; Liu, Y.; Zhang, T. Y.; Pang, Y.; Wang, Q.; Jiang, S.; Yang,

- Y.; Ren, T. L., High Performance Flexible Strain Sensor Based on Self-Locked Overlapping Graphene Sheets. *Nanoscale* **2016**, 8, 20090-20095.
- (12) Wang, C.; Li, X.; Gao, E.; Jian, M.; Xia, K.; Wang, Q.; Xu, Z.; Ren, T.; Zhang, Y., Carbonized Silk Fabric for Ultrastretchable, Highly Sensitive, and Wearable Strain Sensors. *Adv. Mater.* **2016**, 28, 6640-6648.
- (13) Li, C.; Cui, Y. L.; Tian, G. L.; Shu, Y.; Wang, X. F.; Tian, H.; Yang, Y.; Wei, F.; Ren, T. L., Flexible CNT-Array Double Helices Strain Sensor with High Stretchability for Motion Capture. *Sci. Rep.* **2015**, 5, 15554.
- (14) Wang, Z.; Huang, Y.; Sun, J.; Huang, Y.; Hu, H.; Jiang, R.; Gai, W.; Li, G.; Zhi, C., Polyurethane/Cotton/Carbon Nanotubes Core-Spun Yarn as High Reliability Stretchable Strain Sensor for Human Motion Detection. *ACS Appl. Mater. Interfaces* **2016**, 8, 24837-24843.
- (15) Park, J. J.; Hyun, W. J.; Mun, S. C.; Park, Y. T.; Park, O. O., Highly Stretchable and Wearable Graphene Strain Sensors with Controllable Sensitivity for Human Motion Monitoring. *ACS Appl. Mater. Interfaces* **2015**, 7, 6317-6324.
- (16) Shin, M. K.; Oh, J.; Lima, M.; Kozlov, M. E.; Kim, S. J.; Baughman, R. H., Elastomeric Conductive Composites Based on Carbon Nanotube Forests. *Adv. Mater.* **2010**, 22, 2663-2667.
